# Supplementary material
Source: PubMed Central journal article supplement (PMC7642171)
Supplement: NIHMS1628632-supplement-1.pdf [file NIHMS1628632-supplement-1.pdf]

## Supplementary Figures

**Supplementary Figure 1.** Phylogenetic trees of GRF and GIF families for wheat (yellow highlight and corresponding RefSeq v1.0 names), rice, Arabidopsis, citrus and grape. The closest homologs to wheat GRF4 and GIF1 are highlighted in orange for citrus and in violet for grape. **A)** We used the QLQ and WRC domains for the analysis of the GRF proteins and **B)** the SNH domain for the analysis of the GIF proteins. The evolutionary history was inferred by using the Maximum Likelihood method. We show the tree with the highest log-likelihood. The percentage of trees in which the associated taxa clustered together is shown next to the branches. We conducted the evolutionary analysis in MEGA X<sup>1</sup>. Yellow highlight: wheat. Orange highlight: selected *Citrus* homolog. Violet highlight: selected *Vitis* homolog. Note that the cluster including wheat and rice GRF3, GRF4, and GRF5 proteins does not include any Arabidopsis protein.

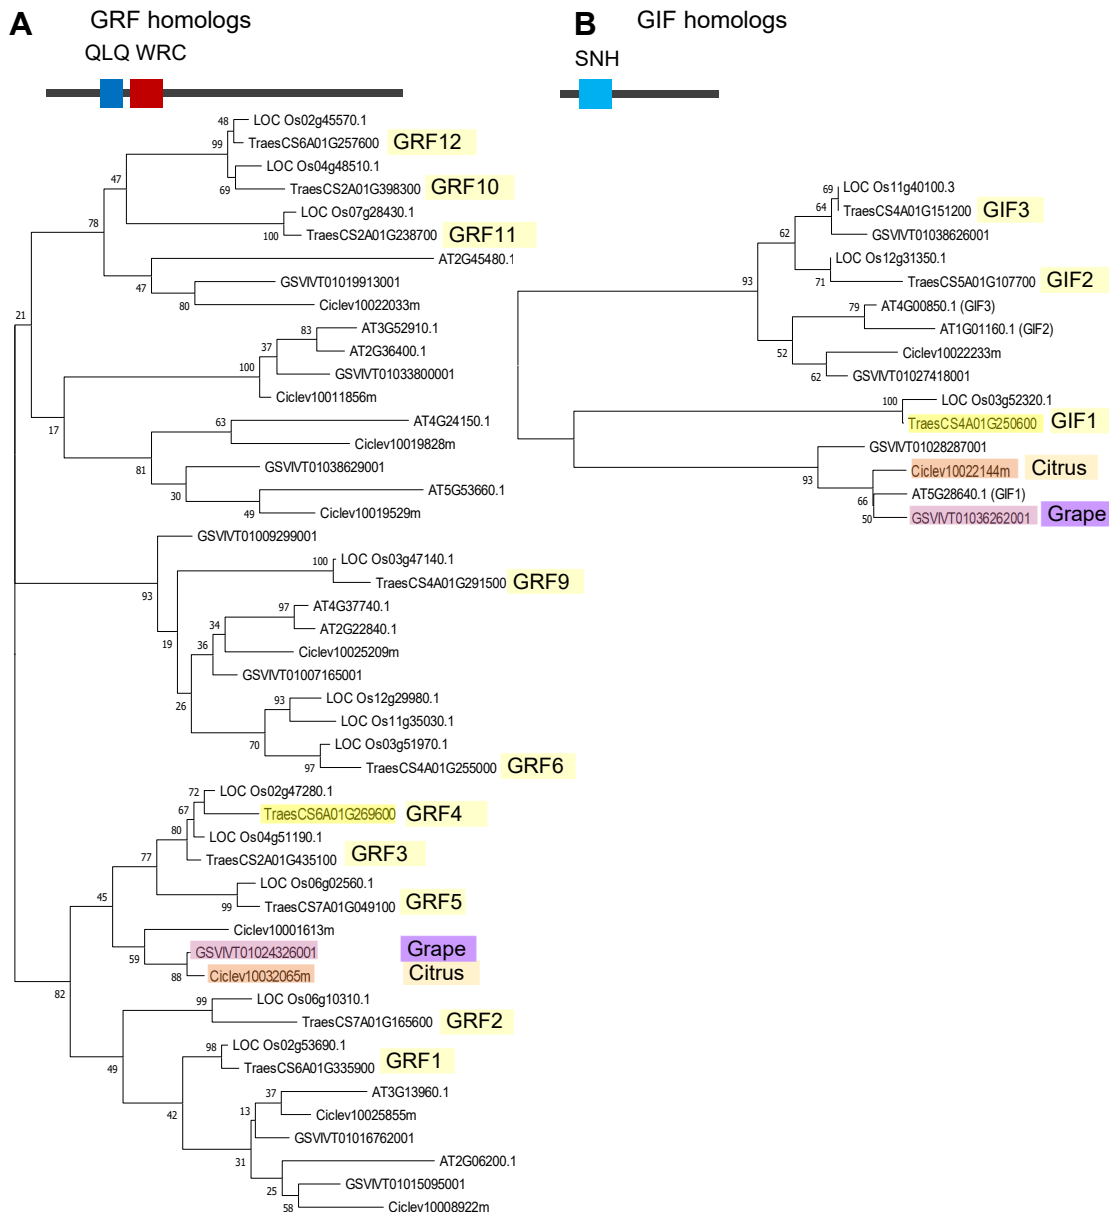

**Supplementary Figure 2.** Accelerated wheat transformation protocol using the *GRF4-GIF1* chimera relative to normal protocol of wheat transformation at the UC Davis transformation facility. The protocol with the *GRF4-GIF1* chimera is faster, reducing the overall process by five weeks.

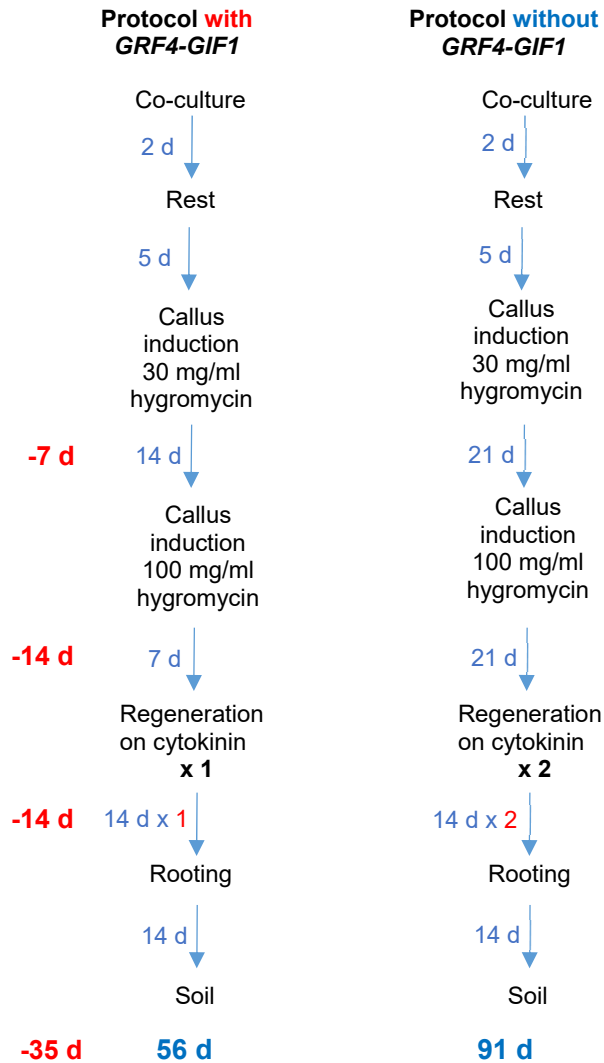

The wheat transformation protocol with *GRF4-GIF1* is five weeks faster

**Supplementary Figure 3.** Effect of the *GRF4-GIF1* chimera in regeneration efficiency in different genotypes. **A)** Representative transformations showing higher frequency of regenerated shoots in the presence of the *GRF4-GIF1* chimera than in the control (empty vector) in different wheat and Triticale genotypes. **B)** Box-plots showing regeneration efficiencies of *GRF4-GIF1* vs. control in the same cultivars as in A. The raw data is available in Supplementary Table 4A and B. The number of independent experiments is indicated in parenthesis after the genotype name and the total number of inoculated embryos is indicated below. The box shows the range from first to third quartiles, and is divided by the median. The whiskers span down to the minimum, and up to the maximum observation. Empty black circles are regeneration results from individual experiments. No statistical analysis is presented for these experiments because transformations of many of these cultivars without the *GRF4-GIF1* chimera showed 0 or close to 0 regeneration frequencies. Averages are presented above the box-plots.

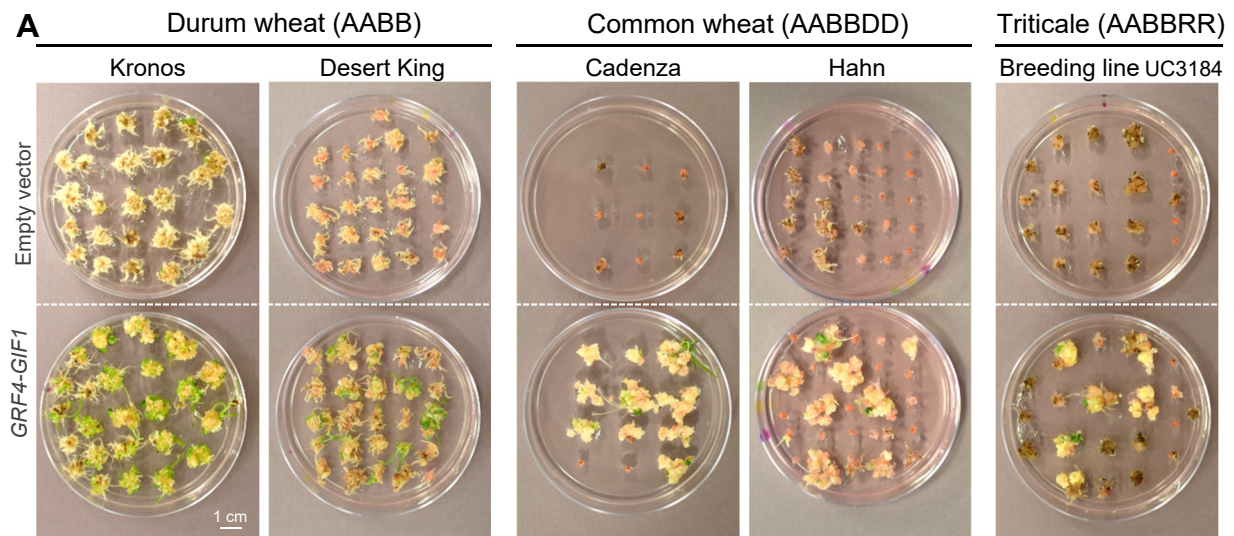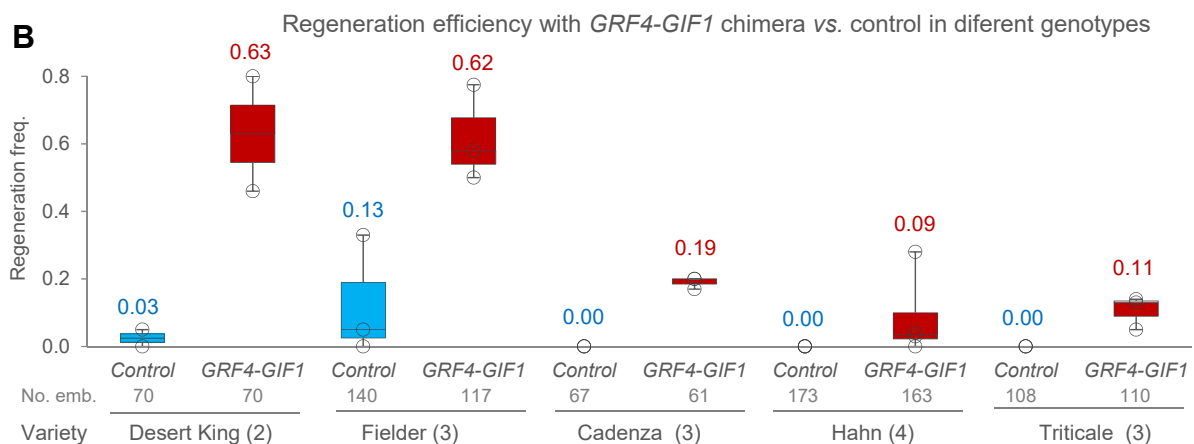

**Supplementary Figure 4.** Effect of the *GRF4-GIF1* chimera in regeneration efficiency in the absence of exogenous cytokinin. Immature wheat embryos from a *GRF4-GIF1* transgenic Kronos T<sub>1</sub> plant and a segregating non-transgenic T<sub>1</sub> sister line were treated following the standard transformation protocol, excluding the *Agrobacterium* inoculation and the addition of hygromycin to the plates. In the last step, the calli were transferred to regeneration media in the absence of cytokinin. The number of calli regenerating green shoots was significantly higher in the *GRF4-GIF1* transgenic plant (21 out of 27) than in the non-transgenic sister control (3 out of 26). The picture shows representative plates with calli in regeneration media without cytokinin.

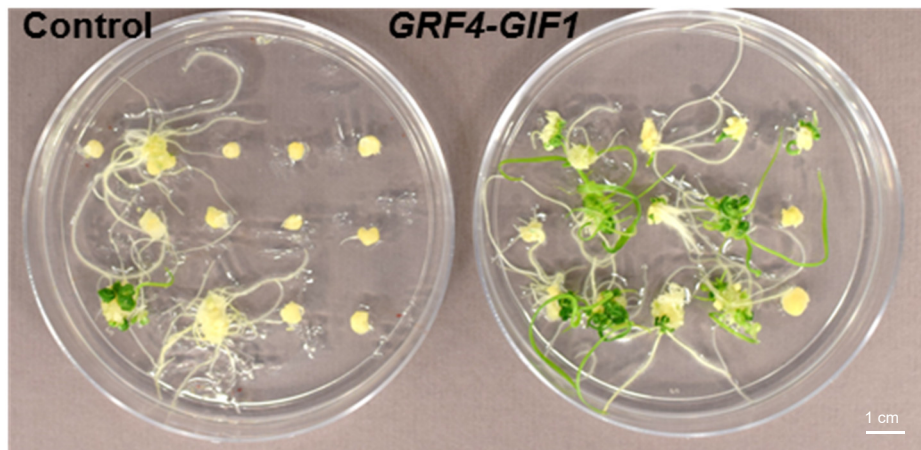

**Supplementary Figure 5. Genome edited wheat plants using combined *GRF4-GIF1* – CRISPR-Cas9 technology.** We recovered 30 independent transgenic events (white numbers) out of 32 infected callus. Calli 6 and 13 (red numbers) were not transgenic. Figures are examples of a transgenic (2) and non-transgenic (13) callus. Editing disrupts a *StyI* restriction site in the target region resulting in an undigested band (red arrow). Not edited sequences are digested (blue arrows). Ten of the edited events were sequenced and the detected mutations are presented in Figure 3D. M = 100 bp ladder. Control = non-transgenic Kronos.

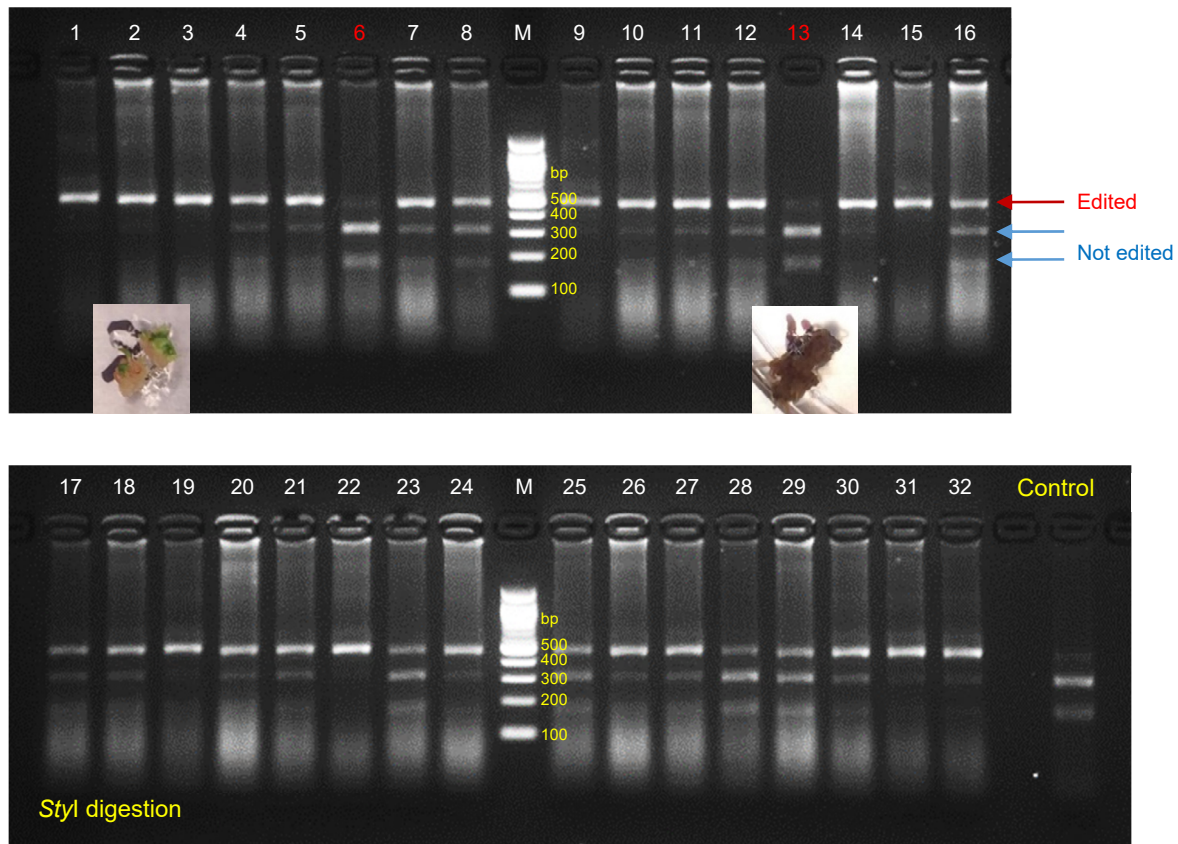

**Supplementary Figure 6. Transformation of dicot species with GRF-GIF chimers.** **A)** *Citrus* epicotyls transformed with an empty vector and the *Citrus* GRF-GIF chimera (60 d after *Agrobacterium* inoculation). **B)** *Citrus* epicotyls transformed with an empty vector and the *Vitis* GRF-GIF and miR396-resistant *Vitis* GRF-GIF (*rGRF-GIF*) (120 d after inoculation). **C)** Scheme of a *Vitis* GRF-GIF chimera showing the miR396 target site and its interaction with miR396 below. In the miR396-resistant *rGRF-GIF* version, we introduced silent mutations (in red) to reduce interactions with miR396. **D)** Box-plots comparing three *Citrus* experiments. Regeneration results from individual experiments are indicated by empty black circles. Box-plot definition is the same as in Supplementary Figure 3. Different letters above the box-plots indicate significant Tukey test ( $P < 0.05$ ). Horizontal lines on top indicate a significant contrast between the control and combined GRF-GIF constructs ( $P = 0.0136$ ). Normality of residuals was confirmed by Shapiro-Wilk's test and homogeneity of variances by Levene's test.

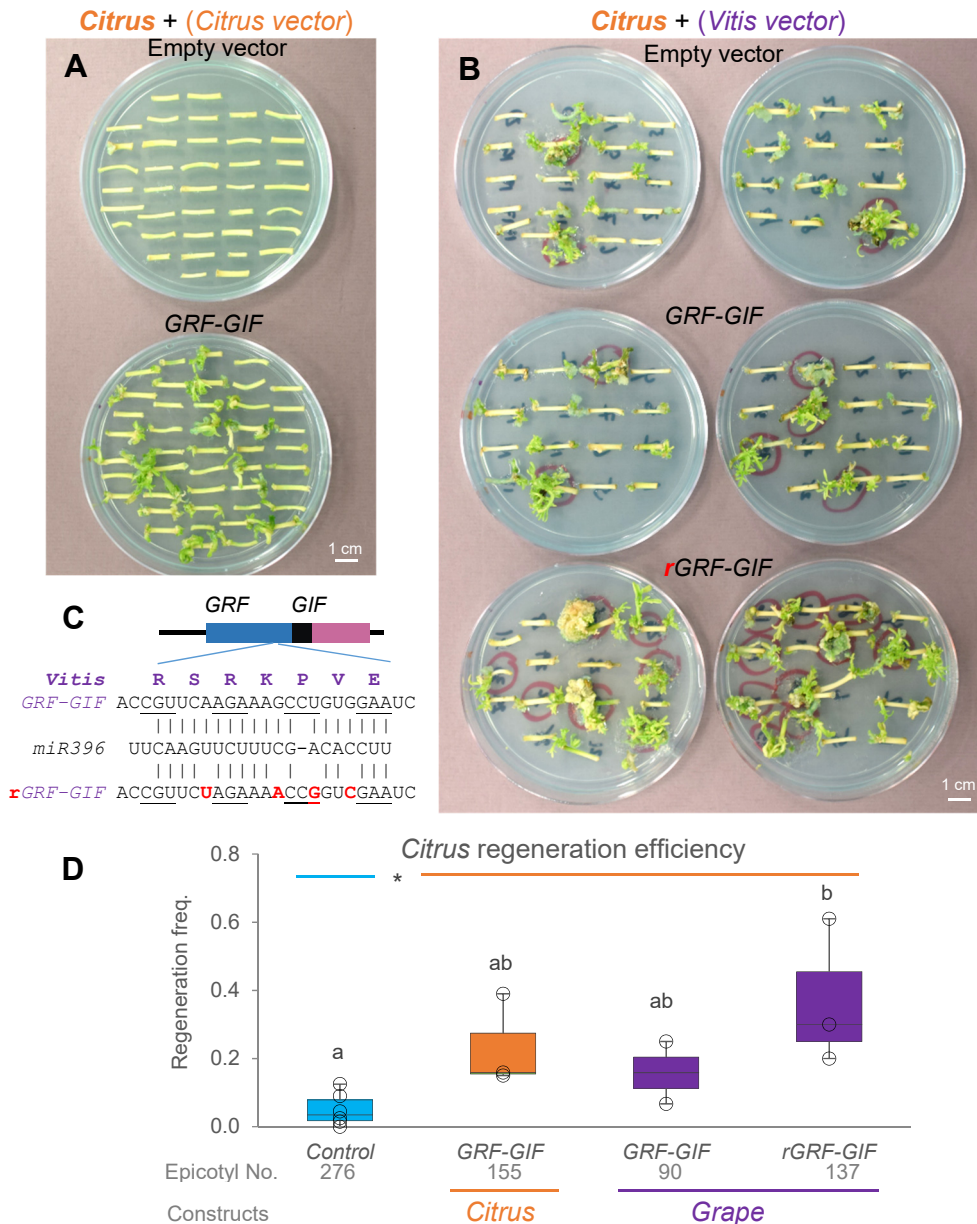

## SUPPLEMEN

### SUPPLEMENTARY TABLES

**Supplementary Table 1.** Primers used in this study.

| Name                                                     | Sequence                                                                                                                                                                              | Gene                         |
|----------------------------------------------------------|---------------------------------------------------------------------------------------------------------------------------------------------------------------------------------------|------------------------------|
| Fw-GRF4a<br>Rev-GRF4a                                    | GGGGACAAGTTTGTACAAAAAAGCTGCCACCATGGCGATGCCGTATGCCTCT<br>GGGGACCACTTTGTACAAGAAAGCTGAACGGTACATYTCGCCGGCGAACAG                                                                           | GRF4                         |
| Fw-GIF1a<br>Rev-GIF1a                                    | GGGGACAAGTTTGTACAAAAAAGCTGCCACCATGCAGCAGCAACACCTGATG<br>GGGGACCACTTTGTACAAGAAAGCTGAACGGCTTCCTTCCTCCTCGGT                                                                              | GIF1                         |
| Fw-GRF4a<br>Rev-GRF4b<br>Fw-GIF1b<br>Rev-GIF1b           | GGGGACAAGTTTGTACAAAAAAGCTGCCACCATGGCGATGCCGTATGCCTCT<br>GGCAGCGGCCCGCTACATYTCGCCGGCGAACAG<br>GCGGCCGCTGCCATGCAGCAGCAACACCTGATG<br>GGGGACCACTTTGTACAAGAAAGCTGAACGCTAGCTTCCTTCCTCCTCGGT | GRF4-GIF1                    |
| Fw_HindIII<br>Rev-HindIII                                | GCCACTCAGCAAGCTTTGCAGCGT<br>TCACGCTGCAAAGCTCTAATTCCCGATCTAGTAAC                                                                                                                       | Ubi::GRF4-term               |
| Fw_ZmUbi-AscI<br>Rev_NosTerm-AscI                        | GGATCTGCAGGCGCGTGCAGCGTGACCCGGTCGTG<br>TGCACTGCAGGCGCGCTAATTCCCGATCTAGTAAC                                                                                                            | Ubi::GRF4-GIF1-term          |
| QT1-F-GG<br>QT1-R-GG                                     | ACTTGATGAGGAAGTGGACCAAGG<br>AAACCCTTGGTCCAGTTCCTCATC                                                                                                                                  | Q gene gRNA                  |
| QT1check-F<br>QT1check-R                                 | TGAGCGACTACGAGGAGGAT<br>CAGCTGCCCTGTCACATCTA                                                                                                                                          | Q gene genotyping            |
| Fw-rGRF-Vvi<br>Rev-rGRF-Vvi<br>Fw-GRF-Vvi<br>Rev-GIF-Vvi | TCTAGAAAACCGGTCGAATCACAAACTA<br>TCGACCGGTTTTCTAGAACGGTTGCGG<br>GGGGACAAGTTTGTACAAAAAAGCTGCCACCATGAAGCAAAGCTTTGTGG<br>GGGGACCACTTTGTACAAGAAAGCTGAACGTC AATTC CATCTTCAGCA               | rGRF-GIF                     |
| pLC41_1064<br>pLC41_1061                                 | TCGCTTATTTAAAGGGCGAAT<br>AGCGCGCAAAC TAGGATAAA                                                                                                                                        | Transgenic plants genotyping |

**Supplementary Table 2.** Grain measurements in *GRF4-GIF1* T1 transgenic plants and their sister negative controls in a growth chamber (16 h light at 22 °C and 8 h darkness at 18 °C, light intensity 260  $\mu\text{M m}^{-2} \text{s}^{-1}$ ). Two statistical analyses are presented: 1) A more conservative test using the averages of the families from each event as experimental units (5 negatives vs. 3 positives). 2) A more liberal test using the individual plants as experimental units (38 negatives vs. 16 positives). Parameters from individual plants were obtained from an average of 23 grains estimated from a Marvin Grain Analyzer. The JD561 numbers indicate independent transformation events with the same *GRF4-GIF1* construct.

| <i>GRF4-GIF1</i> (JD561)                | Plants | Spikelets / spike | Grains / spike | TGW(g)  | Area (mm <sup>2</sup> ) | Width (mm) | Length (mm) |
|-----------------------------------------|--------|-------------------|----------------|---------|-------------------------|------------|-------------|
| Negative (JD561#2-1)                    | 8      | 13.25             | 26             | 41.48   | 17.75                   | 3.31       | 7.43        |
| Negative (JD561#12-1)                   | 9      | 12.78             | 23             | 57.04   | 20.85                   | 3.69       | 7.80        |
| Negative (JD561#20-6)                   | 4      | 11.50             | 23             | 55.92   | 20.07                   | 3.66       | 7.63        |
| Negative (JD561#21-1)                   | 12     | 11.67             | 27             | 55.50   | 19.74                   | 3.60       | 7.63        |
| Negative (JD561#23-8 )                  | 5      | 12.80             | 26             | 51.81   | 19.27                   | 3.55       | 7.43        |
| Positive (JD561#13-1)                   | 9      | 9.67              | 18             | 59.68   | 22.18                   | 3.67       | 8.31        |
| Positive (JD561#20-11)                  | 2      | 10.00             | 13             | 57.09   | 21.60                   | 3.69       | 8.08        |
| Positive (JD561#23-6)                   | 5      | 11.00             | 21             | 60.66   | 21.38                   | 3.68       | 8.00        |
| Weighted Avg. negatives                 | 38     | 12.39             | 25.10          | 52.47   | 19.56                   | 3.56       | 7.60        |
| Weighted Avg. transgenic                | 16     | 10.13             | 19.10          | 59.66   | 21.86                   | 3.68       | 8.18        |
| % increase                              |        | -18.3%            | -23.9%         | 13.7%   | 11.7%                   | 3.2%       | 7.7%        |
| Two side <i>t</i> -test (family as e.u) |        | 0.007             | 0.007          | 0.131   | 0.022                   | 0.239      | 0.003       |
| Two side <i>t</i> -test (plant as e.u.) |        | 3.3E-04           | 8.9E-05        | 2.9E-03 | 5.7E-06                 | 1.5E-02    | 1.5E-08     |



**Supplementary Table 3.** Regeneration frequencies for different *GRF-GIF* combinations compared with empty vector in tetraploid wheat Kronos. The number of embryos used is indicated below each frequency. Regeneration frequencies were estimated as the number of calluses showing at least one regenerating shoot / total number of inoculated embryos. The blue “x” indicate the experiments included in the statistical analyses presented in the different figures and supplementary figures. All experiments in this Table used the regular 91 d protocol and *Agrobacterium* strain EHA105.

| Exp.             | pLC41      | GRF4-      | Fig. | GRF4 &     | Fig. | GIF1       | GRF4       | Fig. | GRF4-      |            | Fig. | GRF5       | GRF1       | GRF9       | Fig. |
|------------------|------------|------------|------|------------|------|------------|------------|------|------------|------------|------|------------|------------|------------|------|
|                  |            | GIF1       | 1D   | GIF1       | 1E   |            |            | 1F   | GIF2       | GIF3       | 1G   | -GIF1      | 1I         | 1J         |      |
| 1-a              | 0.04<br>25 | 0.90<br>48 | x    |            |      |            |            |      |            |            |      |            |            |            |      |
| 1-b              | 0.08<br>25 | 0.96<br>25 | x    |            |      |            |            |      |            |            |      |            |            |            |      |
| 2                |            | 0.27<br>60 |      | 0.06<br>32 | x    |            |            |      |            |            |      |            |            |            |      |
| 3                |            | 0.91<br>79 |      | 0.77<br>83 | x    |            |            |      |            |            |      |            |            |            |      |
| 3b <sup>a</sup>  |            | 0.60<br>47 |      | 0.14<br>41 | x    |            |            |      |            |            |      |            |            |            |      |
| 4                | 0.13<br>53 | 0.70<br>50 | x    | 0.46<br>48 | x    | 0.57<br>47 |            |      |            |            |      |            |            |            |      |
| 6                | 0.20<br>20 | 0.65<br>20 | x    | 0.50<br>20 | x    | 0.35<br>20 |            |      |            |            |      |            |            |            |      |
| 22               | 0.16<br>24 | 0.82<br>28 | x    |            |      | 0.16<br>24 | 0.64<br>25 | x    |            |            |      |            |            |            |      |
| 25               | 0.00<br>15 | 0.70<br>20 | x    |            |      | 0.40<br>15 | 0.06<br>15 | x    |            |            |      |            |            |            |      |
| 25b <sup>a</sup> | 0.00<br>15 | 0.35<br>17 | x    |            |      | 0.00<br>15 | 0.00<br>15 | x    |            |            |      |            |            |            |      |
| 26               | 0.08<br>24 | 0.55<br>20 | x    |            |      | 0.20<br>20 | 0.20<br>20 | x    |            |            |      |            |            |            |      |
| 26b <sup>b</sup> | 0.06<br>16 | 0.31<br>16 | x    |            |      | 0.10<br>10 | 0.12<br>16 | x    |            |            |      |            |            |            |      |
| 12               | 0.00<br>10 | 0.50<br>10 | x    |            |      |            |            |      | 0.20<br>10 | 0.20<br>10 | x    |            |            |            |      |
| 13               | 0.17<br>24 | 0.72<br>25 | x    |            |      |            |            |      | 0.50<br>24 | 0.46<br>24 | x    |            |            |            |      |
| 24               | 0.10<br>10 | 0.50<br>10 | x    |            |      |            |            |      | 0.50<br>10 | 0.30<br>10 | x    |            | 0.10<br>10 | 0.30<br>10 | x    |
| 17               | 0.00<br>21 | 0.67<br>21 | x    |            |      |            |            |      |            |            |      | 0.57<br>21 | 0.16<br>19 | 0.19<br>21 | x    |
| 18               | 0.20<br>24 | 0.88<br>24 | x    |            |      |            |            |      |            |            |      | 0.70<br>23 | 0.79<br>24 | 0.76<br>21 | x    |
| 28               | 0.02<br>44 | 0.56<br>43 | x    |            |      |            |            |      |            |            |      | 0.21<br>42 | 0.16<br>45 | 0.06<br>18 | x    |

"-" indicates a fused protein or chimera, "&" indicates individual genes induced by separate promoters.

<sup>a</sup> No embryo dissection.

<sup>b</sup> No cytokinin.

**Supplementary Table 4.** Regeneration frequencies in plants transformed with the *Ubi::GRF4-GIF1* chimera or the empty vector pLC41. **A)** Tetraploid and hexaploid wheat commercial cultivars. **B)** Triticale breeding line UC3190. EHA105 and AGL1 are two different *Agrobacterium* strains (no differences were observed between the two strains). The number of embryos used for each genotype is indicated below the regeneration frequency.

**A. Wheat**

| Desert King (4x)      | Exp1<br>EHA105 | Exp2<br>EHA105 | Average      | SE    |
|-----------------------|----------------|----------------|--------------|-------|
| pLC41                 | 0.05<br>20     | 0<br>50        | <b>0.025</b> | 0.025 |
| <i>Ubi::GRF4-GIF1</i> | 0.80<br>20     | 0.46<br>50     | <b>0.630</b> | 0.170 |

| Fielder (6x)          | Exp1 UCD<br>EHA105 | Exp2 UCD<br>EHA105 | UCD<br>Average | UCD<br>SE |
|-----------------------|--------------------|--------------------|----------------|-----------|
| pLC41                 | 0.05<br>49         | 0<br>10            | <b>0.025</b>   | 0.025     |
| <i>Ubi::GRF4-GIF1</i> | 0.58<br>67         | 0.5<br>10          | <b>0.540</b>   | 0.040     |

| Fielder (6x)          | Exp1 JIC<br>AGL1 | Three Fielder experiments<br>Average | SE    |
|-----------------------|------------------|--------------------------------------|-------|
| pAGM8031              | 0.33<br>81       | 0.127                                | 0.103 |
| <i>Ubi::GRF4-GIF1</i> | 0.775<br>40      | 0.618                                | 0.082 |

| Cadenza (6x)          | Exp1<br>AGL1 | Exp2<br>AGL1 | Exp3<br>EHA105 | Average      | SE    |
|-----------------------|--------------|--------------|----------------|--------------|-------|
| pLC41                 | 0<br>19      | 0<br>23      | 0<br>25        | <b>0.000</b> | 0.000 |
| <i>Ubi::GRF4-GIF1</i> | 0.20<br>12   | 0.17<br>24   | 0.20<br>25     | <b>0.190</b> | 0.010 |

| Hahn (6x)             | Exp1<br>EHA105 | Exp2<br>EHA105 | Exp3<br>EHA105 | Exp4<br>AGL1 | Average      | SE    |
|-----------------------|----------------|----------------|----------------|--------------|--------------|-------|
| pLC41                 | 0<br>31        | 0<br>48        | 0<br>69        | 0<br>25      | <b>0.000</b> | 0.000 |
| <i>Ubi::GRF4-GIF1</i> | 0.03<br>37     | 0.04<br>50     | 0<br>51        | 0.28<br>25   | <b>0.088</b> | 0.087 |

**Supplementary Table 4B. Triticale**

| Triticale UC3190 (6x) | Exp9<br>EHA105 | Exp11<br>EHA105 | Exp15<br>EHA105 | Average      | SE    |
|-----------------------|----------------|-----------------|-----------------|--------------|-------|
| pLC41                 | 0<br>45        | 0<br>21         | 0<br>42         | <b>0.000</b> | 0.000 |
| <i>Ubi::GRF4-GIF1</i> | 0.05<br>45     | 0.13<br>22      | 0.14<br>43      | <b>0.107</b> | 0.028 |

**Supplementary Table 5.** Regeneration frequencies in wheat transformation with *Agrobacterium*

| Wheat methods                                 | Explant                         | Average efficiency             | Marker     | Agro strain      | Cultivars                                                 |
|-----------------------------------------------|---------------------------------|--------------------------------|------------|------------------|-----------------------------------------------------------|
| This study without <i>GRF4-GIF1</i>           | immature embryos                | 8.3 / 2.5 %<br>12.7 % / 0.0 %  | HPT        | EHA105           | Kronos (4x) / 1 other (4x)<br>Fielder (6x) / 2 other (6x) |
| <i>GRF4-GIF1</i>                              | immature embryos                | 65.1 / 63.0 %<br>61.8 / 13.9 % | HPT        | EHA105           | Kronos (4x) / 1 other (4x)<br>Fielder (6x) / 2 other (6x) |
| Cheng et al., 1997 <sup>2</sup>               | immature embryos                | 2.2 %                          | NPT        | C58 (ABI)        | Bobwhite (6x)                                             |
| Khanna HK, Daggard GE 2003 <sup>3</sup>       | immature embryos                | 3.9 %                          | PPT        | LBA4404          | Veery5 (6x)                                               |
| Wu et al., 2003 <sup>4</sup>                  | immature embryos                | 9.5 / 4.5 %                    | PPT        | AGL1             | Bobwhite / 3 other (6x)                                   |
| Cheng et al., 2003 <sup>5</sup>               | immature embryos                | 1.1%                           | NPT II     | C58 (ABI)        | Bobwhite (6x)                                             |
| Hu et al., 2003 <sup>6</sup>                  | immature embryos                | 4.4 %                          | Glyphosate | C58 (ABI)        | Bobwhite (6x)                                             |
| Przetakiewicz et al., 2004 <sup>7</sup>       | immature embryos                | 12.6 / 2.3 %                   | NPT II     | EHA101 / LBA4404 | Kontesa, Torka & Eta (6x)                                 |
| Mitic et al., 2004 <sup>8</sup>               | immature embryos                | 0.6 %                          | PPT / HPT  | AGL1 / LBA4404   | Vesna (6x)                                                |
| Wu et al., 2008 <sup>9</sup>                  | immature embryos                | 3.0 %                          | PPT        | AGL1             | Ofanto (4x)                                               |
| Risacher et al., 2009 <sup>10</sup>           | immature seeds <i>in planta</i> | 5.0 %                          | NPT II     | EHA105           | NB1 (6x)                                                  |
| He et al., 2010 <sup>11</sup>                 | immature embryos                | 6.3 %                          | PPT        | AGL1             | Stewart (4x)                                              |
| Bińska et al., 2012 <sup>12</sup>             | immature embryos                | 3.4 %                          | NPT / PPT  | EHA101/AGL1      | Kontesa, Torka (6x)                                       |
| Hensel et al., 2017 <sup>13</sup>             | immature embryos                | 5 to 15 % <sup>a</sup>         | HPT        | AGL1             | Bobwhite (6x)                                             |
| Hayta et al., 2019 <sup>14</sup>              | immature embryos                | 19 %                           | HPT        | AGL1             | Fielder (6x)                                              |
| <b>Proprietary Japan Tobacco <sup>b</sup></b> |                                 |                                |            |                  |                                                           |
| Ishida et al., 2015 <sup>c 15</sup>           | immature embryos                | 76.2 / 60.8 %                  | PPT / HPT  | EHA101/EHA105    | Fielder (6x, PPT vs HPT)                                  |
| Richardson et al., 2014 <sup>16</sup>         | immature embryos                | 40.9 / 12.1 %<br>50.8 / 26.0 % | PPT        | AGL1             | Fielder / 9 other (6x)<br>Kronos / 1 other (4x)           |
| Wang et al., 2017 <sup>17</sup>               | immature embryos                | 45.3 / 10.8 %                  | PPT        | C58C1            | Fielder / 17 other (6x)                                   |

<sup>a</sup> Only range provided

<sup>b</sup> At UCD, we purchased the JT license and received training at their company. However, without the *GRF4-GIF1*, we have not been able to obtain the high regeneration efficiencies reported in Ishida et al. 2015 <sup>15</sup> (likely because we use a wider range of embryo sizes collected from plant grown under different conditions)

<sup>c</sup> Report by the Japan Tobacco company in a non-peer reviewed journal

**Supplementary Table 6.** Regeneration frequencies in rice (*Oryza sativa*) cultivar Kitaake. Experiments 1 and 6 utilized the wheat-optimized vector pLC41 with or without the *Ubi::GRF4-GIF1* chimera. Experiments 2-5 used pCAMBIA1300, a vector frequently utilized in rice transformation, with or without the *Ubi::GRF4-GIF1* chimera. In each of these three experiments, calli generated from the same seed stock were inoculated with *Agrobacterium* containing the designated vector construct. In experiment 2, pCAMBIA1300-sgRNA refers to the pCAMBIA1300 vector carrying *Ubi::GRF4-GIF1* chimera plus a sgRNA targeted to gene *OsKitaake06g041700* encoding a TYROSYLPROTEIN SULFOTRANSFERASE (TPST). In experiments 3 and 4, pCAMBIA1300-gus refers to the control pCAMBIA1300-gus without the chimera. All experiments employed *Agrobacterium* strain EHA105. The number of calli used for each genotype is indicated below the regeneration frequency

| Rice Kitaake          | Exp1  | Exp2-4            | Exp5        | Exp6  | Average       | SE    |
|-----------------------|-------|-------------------|-------------|-------|---------------|-------|
| No. calli inoc.       | n=85  | n=100 x 3         | n=50        | n=50  |               |       |
| No <i>GRF4-GIF1</i>   | 0.118 | 0.235             | 0.22        | 0.24  | <b>0.2033</b> | 0.028 |
|                       | pLC41 | pCAMBIA1300-gus   | pCambia1300 | pLC41 |               |       |
| <i>Ubi::GRF4-GIF1</i> | 0.353 | 0.460             | 0.44        | 0.46  | <b>0.4283</b> | 0.025 |
|                       | pLC41 | pCAMBIA1300-sgRNA | pCambia1300 | pLC41 |               |       |

Two sided paired *t*-test *GRF4-GIF1* vs. control:  $P < 0.0001$  (n = 4 experiments)

**Supplementary Table 7.** Regeneration frequencies in *Citrus*. Experiments 1 to 3 used a *GRF-GIF* chimera based on *Citrus* sequences whereas experiments 4 to 6 used a *GRF-GIF* chimera based on *Vitis* sequences. In addition, the last three experiments included a second *Vitis* construct with mutations in the miR396 binding site (*rGRF4-GIF1*) that precludes its cleavage. The number of epicotyls used for each genotype is indicated below the regeneration frequency.

| Carrizo                 | Exp1       | Exp2       | Exp3       | Exp4       | Exp5       | Exp6       | Average     | SE   |
|-------------------------|------------|------------|------------|------------|------------|------------|-------------|------|
| Empty vector            | 0.04<br>45 | 0.00<br>38 | 0.12<br>56 | 0.02<br>65 | 0.09<br>32 | 0.02<br>40 | <b>0.05</b> | 0.02 |
| <i>Citrus GRF-GIF</i>   | 0.15<br>45 | 0.39<br>41 | 0.16<br>69 | -          | -          | -          | <b>0.21</b> | 0.09 |
| <i>Vitis GRF-GIF</i>    | -          | -          | -          | 0.07<br>59 | 0.25<br>31 | -          | <b>0.16</b> | 0.09 |
| <i>Vitis rGRF4-GIF1</i> | -          | -          | -          | 0.20<br>66 | 0.61<br>31 | 0.30<br>40 | <b>0.37</b> | 0.12 |

**Supplementary Table 8.** Comparisons of *GRF4-GIF1* with transformation technologies using different morphogenic genes.

| Technology                                                         | Ref.             | Advantages                                                                                                                                                                                                                                                                                                                                                                                                                                                                                                                                                            | Disadvantages / limitations                                                                                                                                                                                                                                                                                                                                                                                                                                                    |
|--------------------------------------------------------------------|------------------|-----------------------------------------------------------------------------------------------------------------------------------------------------------------------------------------------------------------------------------------------------------------------------------------------------------------------------------------------------------------------------------------------------------------------------------------------------------------------------------------------------------------------------------------------------------------------|--------------------------------------------------------------------------------------------------------------------------------------------------------------------------------------------------------------------------------------------------------------------------------------------------------------------------------------------------------------------------------------------------------------------------------------------------------------------------------|
| GRF4-GIF1                                                          | This one         | <ol style="list-style-type: none"> <li>1. Publicly available for research</li> <li>2. No developmental defects</li> <li>3. Expands the range of genotypes that can be transformed</li> <li>4. Rapid transformation protocol (60 days in wheat)</li> <li>5. Robust regeneration efficiencies under broader set of protocols, including embryogenic and organogenic methods</li> <li>6. Simple to implement and combine with gene editing</li> <li>7. Efficient selection without selectable markers (wheat)</li> <li>8. Tested in monocot and dicot species</li> </ol> | <ol style="list-style-type: none"> <li>1. No tested yet in mature tissues in monocots</li> <li>2. Transgene incorporated together with the <i>GRF4-GIF1</i> chimera <sup>a</sup>.</li> <li>3. Only tested in protocols that require in vitro tissue culture</li> </ol>                                                                                                                                                                                                         |
| <i>Bbm-Wus2</i> (CORTEVA)                                          | <sup>18-20</sup> | <ol style="list-style-type: none"> <li>1. High regeneration efficiencies in maize</li> <li>2. Rapid transformation protocol (35 days maize)</li> <li>3. Expanded range of maize germplasm that can be transformed</li> <li>4. Works in mature tissues</li> <li>5. Advanced vectors worked well in sorghum, Indica rice, and sugar cane</li> </ol>                                                                                                                                                                                                                     | <ol style="list-style-type: none"> <li>1. Proprietary (but available for research)</li> <li>2. Protocol optimized for maize. Use of specific maize promoters required to avoid regeneration problems and developmental defects</li> <li>3. Tested only in monocots</li> <li>4. If the BBM-WUS2 is not excised it induces developmental defects. Vectors with a CRE-LOX system are available</li> <li>5. Only tested in methods that require in vitro tissue culture</li> </ol> |
| <i>De novo</i> meristem induction<br>Fast-TrACC<br><i>Wus2/ipt</i> | <sup>21</sup>    | <ol style="list-style-type: none"> <li>1. Sidesteps the need for tissue culture</li> <li>2. Co-delivery of developmental regulators and guide RNAs can generate edited shoots in plants constitutively expressing Cas9</li> <li>3. It worked in <i>Benthamiana</i> soil grown plants</li> </ol>                                                                                                                                                                                                                                                                       | <ol style="list-style-type: none"> <li>1. Tested only in dicot plants (<i>Benthamiana</i>, tomato, potato, grape)</li> <li>2. Fertile plants showed only in <i>Benthamiana</i></li> <li>3. Many edited plants show developmental defects and failed to produce seeds</li> <li>4. Specific developmental regulators need to be defined in each new species</li> <li>5. Needs transgenic plants previously transformed with Cas9</li> </ol>                                      |

<sup>a</sup> This is not a problem for gene editing because both the CRISPR-Cas9 and the *GRF4-GIF1* constructs are segregated out after editing. Although the presence of the *GRF4-GIF1* is not associated with developmental defects, the user can separate the transgene from the *GRF4-GIF1* chimera by using a line previously transformed with the *GRF4-GIF1* without a selectable marker, and then retransforming the same line with the desired transgene. Since the transgene and the *GRF4-GIF1* construct are incorporated in different loci, they can be segregated apart.

## Supplementary References

1. Kumar, S., Stecher, G., Li, M., Knyaz, C. & Tamura, K. MEGA X: Molecular evolutionary genetics analysis across computing platforms. *Mol. Biol. Evol.* **35**, 1547-1549 (2018).
2. Cheng, M. et al. Genetic transformation of wheat mediated by *Agrobacterium tumefaciens*. *Plant Physiol.* **115**, 971-980 (1997).
3. Khanna, H.K. & Daggard, G.E. *Agrobacterium tumefaciens*-mediated transformation of wheat using a superbinary vector and a polyamine-supplemented regeneration medium. *Plant Cell Rep.* **21**, 429-436 (2003).
4. Wu, H., Sparks, C., Amoah, B. & Jones, H.D. Factors influencing successful *Agrobacterium*-mediated genetic transformation of wheat. *Plant Cell Rep.* **21**, 659-668 (2003).
5. Cheng, M., Hu, T.C., Layton, J., Liu, C.N. & Fry, J.E. Desiccation of plant tissues post-*Agrobacterium* infection enhances T-DNA delivery and increases stable transformation efficiency in wheat. *In Vitro Cell. Dev. Biol. Plant* **39**, 595-604 (2003).
6. Hu, T. et al. *Agrobacterium*-mediated large-scale transformation of wheat (*Triticum aestivum* L.) using glyphosate selection. *Plant Cell Rep.* **21**, 1010-1019 (2003).
7. Przetakiewicz, A., Karas, A., Orczyk, W. & Nadolska-Orczyk, A. *Agrobacterium*-mediated transformation of polyploid cereals. The efficiency of selection and transgene expression in wheat. *Cell Mol Biol Lett* **9**, 903-917 (2004).
8. Mitic, N., Nikolic, R., Ninkovic, S., Miljus-Djukic, J. & Neskovic, M. *Agrobacterium*-mediated transformation and plant regeneration of *Triticum aestivum* L. *Biol Plantarum* **48**, 179-184 (2004).
9. Wu, H.X., Doherty, A. & Jones, H.D. Efficient and rapid *Agrobacterium*-mediated genetic transformation of durum wheat (*Triticum turgidum* L.-var. *durum*) using additional virulence genes. *Transgenic Res.* **17**, 425-436 (2008).
10. Risacher, T., Craze, M., Bowden, S., Paul, W. & Barsby, T. in *Methods in molecular biology. Transgenic wheat, barley and oats*, Vol. 478. (eds. H.D. Jones & P.R. Shewry) 115-124 (Humana Press, New York; 2009).
11. He, Y. et al. *Agrobacterium*-mediated transformation of durum wheat (*Triticum turgidum* L. var. *durum* cv Stewart) with improved efficiency. *J. Exp. Bot.* **61**, 1567-1581 (2010).
12. Binka, A., Orczyk, W. & Nadolska-Orczyk, A. The *Agrobacterium*-mediated transformation of common wheat (*Triticum aestivum* L.) and triticale (x *Triticosecale* Wittmack): role of the binary vector system and selection cassettes. *J. Appl. Genet.* **53**, 1-8 (2012).



13. Hensel, G., Marthe, C. & Kumlehn, J. in *Wheat Biotechnology: Methods and Protocols, Methods in Molecular Biology*, Vol. 1679. (eds. P.L. Bhalla & M.B. Singh) 129-139 (2017).
14. Hayta, S. et al. An efficient and reproducible *Agrobacterium*-mediated transformation method for hexaploid wheat (*Triticum aestivum* L.). *Plant Methods* **15**, 121 (2019).
15. Ishida, Y., Hiei, Y. & Komari, T. in *Proceedings of the 12<sup>th</sup> International Wheat Genetics Symposium*. (eds. Y. Ogihara, S. Takumi & H. Handa) 167-173 (Springer, 2015).
16. Richardson, T., Thistleton, J., Higgins, T.J., Howitt, C. & Ayliffe, M. Efficient *Agrobacterium* transformation of elite wheat germplasm without selection. *Plant Cell Tiss. Organ Cult.* **119**, 647–659 (2014).
17. Wang, K., Liu, H.Y., Du, L.P. & Ye, X.G. Generation of marker-free transgenic hexaploid wheat via an *Agrobacterium*-mediated co-transformation strategy in commercial Chinese wheat varieties. *Plant Biotechnol. J.* **15**, 614-623 (2017).
18. Gordon-Kamm, B. et al. Using morphogenic genes to improve recovery and regeneration of transgenic plants. *Plants-Basel* **8** (2019).
19. Lowe, K. et al. Rapid genotype "independent" *Zea mays* L. (maize) transformation via direct somatic embryogenesis. *In Vitro Cell. Dev. Biol. Plant* **54**, 240-252 (2018).
20. Lowe, K. et al. Morphogenic regulators *Baby boom* and *Wuschel* improve Monocot transformation. *Plant Cell* **28**, 1998-2015 (2016).
21. Maher, M.F. et al. Plant gene editing through de novo induction of meristems. *Nat Biotechnol* **38**, 84-89 (2020).
